# Supplementary material for: Transcriptional and Functional Analysis of Bifidobacterium animalis subsp. lactis Exposure to Tetracycline
Source: PubMed Central journal article supplement (PMC6238047; doi:10.1128/aem.01999-18), 2018-11-15
Supplement: zam023188878s1.pdf [file zam023188878s1.pdf]

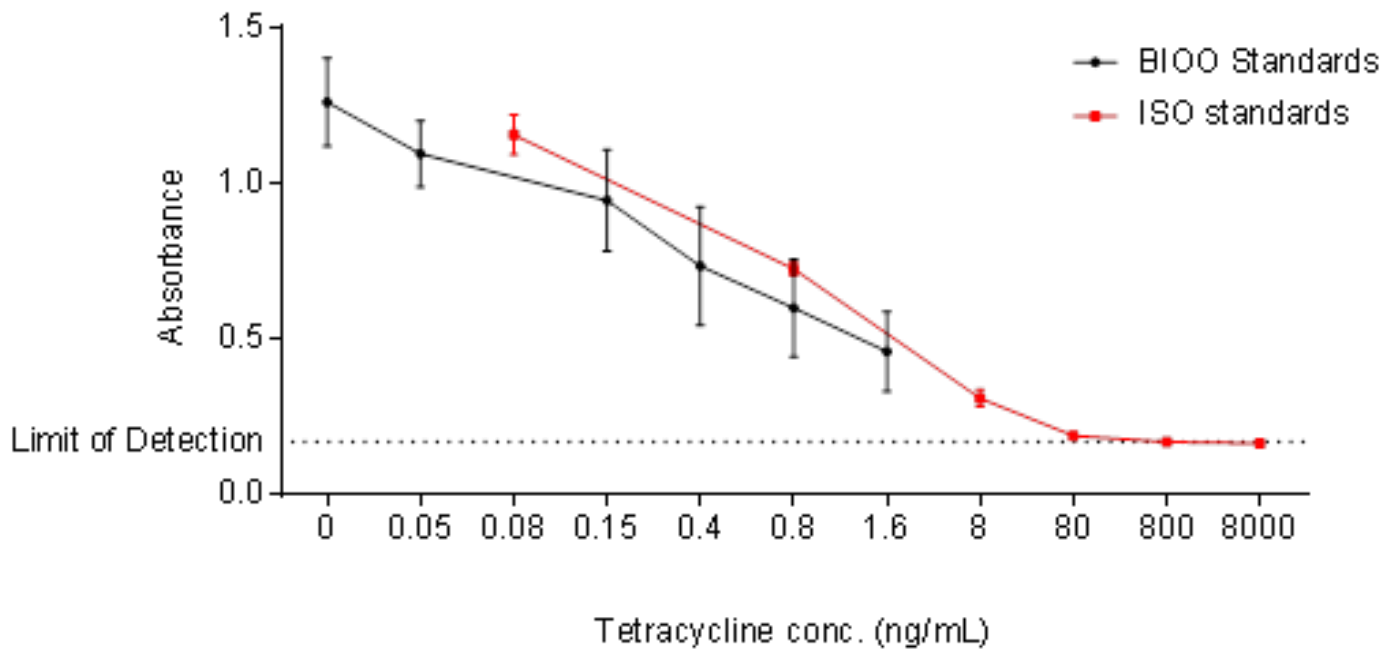

**Figure S1. Validation of tetracycline standards using the BIOO MaxSignal® Tetracycline (TET) ELISA Test Kit.**

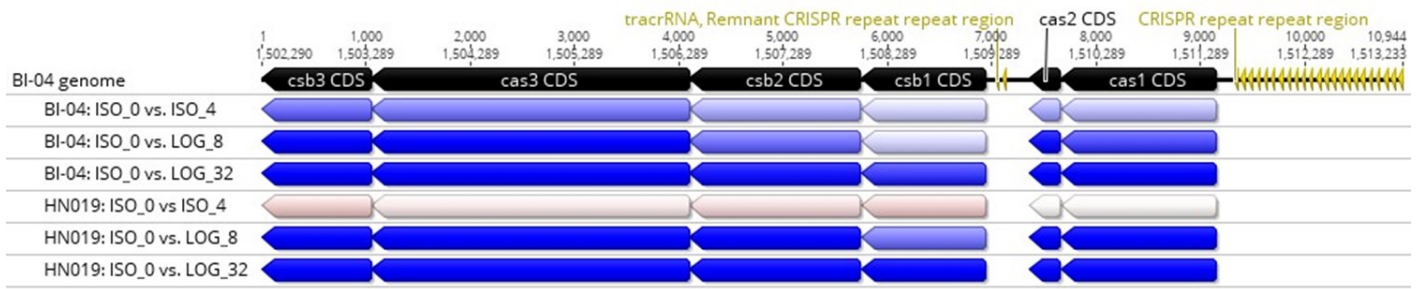

**Figure S2. Transcriptional response of type I-U CRISPR system to tetracycline.** The genetic region as annotated in the BI-04 genome and colored as follows: black, coding sequences; gold, repeat regions including the tracrRNA. The arrows below each gene represent log<sub>2</sub> ratio fold change between ISO\_4, LOG\_8, and LOG\_32 compared to ISO\_0 in descending order, with heat coloring showing downregulation and upregulation with tetracycline by blue and red, respectively.

**Table S1. Polymorphisms between *B. animalis* subsp. *lactis* BI-04 and HN019.** Genes in parenthesis with indels in intergenic regions were analyzed for transcriptional differences associated with the respective indels and are visualized throughout the figures. <sup>1</sup>The reference number for the validation source refers to supplementary references.

| Indel        | BI-04 Start Coordinate | BI-04 ► HN019        | Locus_Tag                       | Annotation                                         | Impact       | Validation source <sup>1</sup> |
|--------------|------------------------|----------------------|---------------------------------|----------------------------------------------------|--------------|--------------------------------|
| 1            | 159534                 | (G)8 ► (G)9          | BALAC_RS00705                   | biotin carboxylase/biotin carboxyl carrier protein | Frame Shift  | [1]                            |
| 2            | 178363                 | G ► T                | IGR (BALAC_RS00780)             | IGR (AGE family epimerase/isomerase)               | -            | This study                     |
| 3            | 281373                 | C ► T                | IGR (BALAC_RS01170)             | IGR (ISL3 family transposase)                      | -            | [1]                            |
| 4            | 291690                 | (G)10 ► (G)12        | IGR (BALAC_RS01215)             | IGR (FAD-dependent oxidoreductase)                 | -            | This study                     |
| 5            | 588995                 | (G)4 ► (G)5          | BALAC_RS02470                   | D-alanyl-D-alanine carboxypeptidase                | Frame Shift  | [1]                            |
| 6            | 686997                 | A ► G                | IGR (BALAC_RS02895)             | IGR (S-ribosylhomocysteine lyase)                  | -            | [1]                            |
| 7            | 775639                 | G ► T                | BALAC_RS03270                   | sensor protein                                     | Substitution | This study                     |
| 8            | 839425                 | C ► T                | BALAC_RS03505                   | Hypothetical membrane protein                      | Substitution | [1]                            |
| 9            | 871369                 | (G)9 ► (G)8          | BALAC_RS03635                   | DNA repair protein <i>recN</i>                     | -            | This study                     |
| 10           | 903000                 | 54 bp deletion ►     | BALAC_RS03810                   | long-chain-fatty acid CoA ligase                   | Frame Shift  | [1]                            |
| 11           | 936104                 | C ► T                | BALAC_RS03990                   | UTP-glucose-1-phosphate uridylyltransferase        | -            | This study                     |
| 12           | 959997                 | A ► G                | IGR (BALAC_RS04135)             | IGR (PAC2 family protein)                          | -            | [1]                            |
| 13           | 993071                 | C ► T                | BALAC_RS04275                   | hypothetical protein                               | Substitution | [1]                            |
| 14A          | 1250864                | C ► T                | BALAC_RS05395                   | GTP pyrophosphokinase                              | Substitution | This study                     |
| 14B          | 1252666                | C ► T                | BALAC_RS05395                   | GTP pyrophosphokinase                              | Substitution | This study                     |
| 15           | 1260073                | G ► C                | BALAC_RS05425                   | glucose uptake protein <i>glcU</i>                 | Substitution | [1]                            |
| Mis-assembly | 1304794                | 6138 bp deletion ►   | BALAC_RS05595                   | Mobile element protein                             | -            | This study                     |
| 16           | 1456395                | (G)4 ► (G)3          | IGR (BALAC_RS06260)             | IGR (membrane protein)                             | -            | [1]                            |
| 17           | 1488165                | (C)10 ► (C)11        | BALAC_RS08305                   | hypothetical protein                               | Frame Shift  | This study                     |
| 18           | 1512373                | 214 bp deletion ►    | CRISPR repeat                   | CRISPR repeat/spacer array                         | -            | [1]                            |
| 19           | 1582283                | C ► T                | IGR (BALAC_RS06695)             | IGR (galactokinase)                                | -            | This study                     |
| 20           | 1632627                | C ► T                | BALAC_RS06895                   | galactosyl transferase <i>cpsD</i>                 | Substitution | This study                     |
| 21           | 1636887                | G ► A                | IGR (BALAC_RS06910)             | IGR (divalent metal cation transporter MntH)       | -            | [1]                            |
| 22           | 1660541                | G ► T                | Error in BI-04 genome           |                                                    |              | This study                     |
| 23           | 1677062                | T ►                  | Error in BI-04 genome           |                                                    |              | This study                     |
| 24           | 1702923                | ► C                  | BALAC_RS07195                   | putative oxalyl-CoA decarboxylase                  | Frame Shift  | [1]                            |
| 25           | 1715788                | 54 bp deletion ►     | IGR (BALAC_RS07220)             | IGR (inorganic diphosphatase)                      | -            | [1]                            |
| 26           | 1766515                | (G)8 ► (G)7          | BALAC_RS07445                   | 23S rRNA                                           | -            | N/A                            |
| 27           | 1815298                | 92 bp deletion ►     | Error in BI-04 genome           |                                                    |              | This study                     |
| 28A-C        | 1847191                | 8,717 bp insertion ► | BALAC_RS07800-<br>BALAC_RS07810 | NAD synthetase - hypothetical protein              | -            | This study                     |
| 29           | 1881197                | C ► T                | BALAC_RS07840                   | LacI-type transcriptional regulator                | -            | [1]                            |

## Supplementary References

1. Briczinski EP, Loquasto JR, Barrangou R, Dudley EG, Roberts AM, Roberts RF. 2009. Strain-specific genotyping of *Bifidobacterium animalis* subsp. *lactis* by using single-nucleotide polymorphisms, insertions, and deletions. *Appl Environ Microbiol* 75:7501-7508.

**Table S2. Scripts for assembly and annotation of *B. animalis* subsp. *lactis* HN019.**

**A. Quality assessment and trimming of Oxford Nanopore data**

```
porechop --discard_middle \  
-i <FASTQ> --threads <CPUS> | \  
seqtk seq -L 1000 | gzip -> <SAMPLE_NAME>.qualtrim.clean.fastq.gz
```

**B. Quality assessment and trimming of Illumina MiSeq data**

```
java -jar trimmomatic-0.36.jar PE \  
-threads <CORES> -phred33 -trimlog <SAMPLE_NAME>.trimmomatic.log \  
<READ1> <READ2> \  
<R1>.qualtrim.paired.fastq.gz <R1>.qualtrim.unpaired.fastq.gz \  
<R2>.qualtrim.paired.fastq.gz <R2>.qualtrim.unpaired.fastq.gz \  
ILLUMINACLIP:<Tru-Seq3 ADAPTERS>:2:15:10 LEADING:28 TRAILING:28 \  
MINLEN:30
```

**C. *De novo* Genome Assembly**

```
unicycler -t <CORES> \  
-1 <TRIMMED_R1> \  
-2 <TRIMMED_R2> \  
--keep 2 \  
-l <TRIMMED_LONG_READS> -o <SAMPLE_NAME>
```

**D. Quality Assessment of assemblies**

```
quast.py --gene-finding \  
-o <SAMPLE_NAME> \  
-R <REFERENCE_GENOME> \  
--threads <CORES> \  
--labels <SAMPLE_NAME> \  
--scaffolds \  
-l Canu,Unicycler,SPAdes \  
<CANU ASSEMBLY> <UNICYCLER ASSEMBLY> <SPADES ASSEMBLY>
```

**E. Annotation**

```
prokka \  
--outdir <SAMPLE_NAME> \  
--prefix <SAMPLE_NAME> --addgenes --locustag <SAMPLE_NAME>p \  
--compliant \  
--kingdom Bacteria \  
--rfam \  
--gram 'pos' \  
--cpus <CORES> \  
<FINAL_ASSEMBLY>
```
